# Supplementary material for: The prevalence and clinicopathological features of programmed death-ligand 1 (PD-L1) expression: a pooled analysis of literatures
Source: PubMed Central journal article supplement (PMC4924769; doi:10.18632/oncotarget.7590), 2016-02-22
Supplement: oncotarget-07-15033-s001.pdf [file oncotarget-07-15033-s001.pdf]

**SUPPLEMENTARY FIGURE**

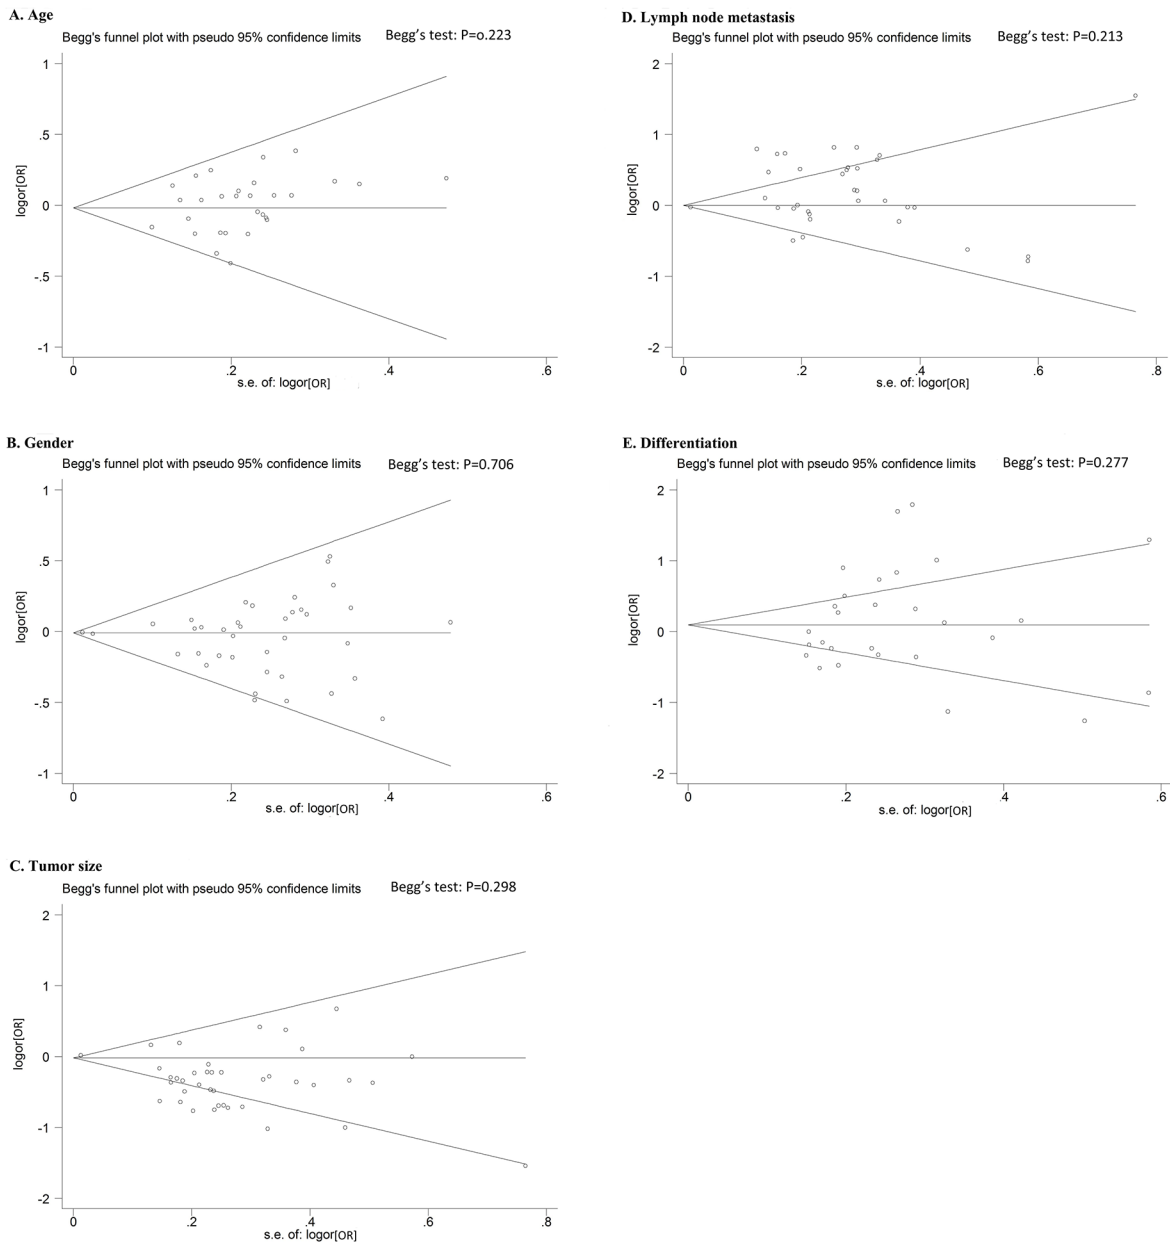

**Supplementary Figure S1: Graphical funnel plot with the Begg's test of the overall result. A. age, B. gender, C. tumor size, D. lymph node metastasis, E. tumor cell differentiation.** Abbreviations: OR = odds ratio; PD-L1 = programmed cell death 1 ligand 1.
